# Supplementary material for: Childhood cardiovascular morphology and function following abnormal fetal growth
Source: PubMed Central journal article supplement (PMC9349157; doi:10.1007/s00380-022-02064-5), 2022-04-15
Supplement: 380_2022_2064_MOESM1_ESM.pdf [file 380_2022_2064_MOESM1_ESM.pdf]

## **SUPPLEMENTARY MATERIAL**

**Re: Childhood cardiovascular morphology and function following abnormal fetal growth**

**Journal: Heart and Vessels**

Rasmus F.W. Olander<sup>a, b</sup>, MD

Linda Litwin<sup>b, c</sup>, MD

Johnny K.M. Sundholm<sup>a, b</sup>, MD, PhD

Taisto Sarkola<sup>a, b</sup>, MD, PhD

<sup>a</sup>Children's Hospital, Pediatric Research Center, University of Helsinki and Helsinki University Hospital, Helsinki, Finland

<sup>b</sup>Minerva Foundation Institute for Medical Research, Helsinki, Finland

<sup>c</sup>Department of Congenital Heart Defects and Pediatric Cardiology, FMS, Medical University of Silesia, Katowice, Poland

**Corresponding author:** Rasmus Olander, Children's Hospital, Pediatric Research Center, University of Helsinki and Helsinki University Hospital, e-mail: [rasmus.olander@helsinki.fi](mailto:rasmus.olander@helsinki.fi)

## **SUPPLEMENTARY METHODS**

### **Dietary patterns**

Dietary patterns were examined using a food frequency questionnaire, in which the frequency of consumption of certain food items at home was recorded for one week. A modified version of the Finnish Children Healthy Eating Index (FCHEI) was used to examine these dietary patterns [1]. To create this modified FCHEI-score, we used the frequency of use of food items belonging to five major subcategories (vegetables, fruits and berries, skimmed milk, foods containing high amounts of sugar, fish and fish dishes and the use of vegetable oils or margarine). Subcategory scores were created by first assigning 0 score if subcategory frequency was 0, and then dividing those who have used a product into quantiles. For vegetables, fruits, and berries as well as foods containing high amounts of sugar, no subject scored 0, and data was divided into deciles. For skimmed milk and fish and fish dishes, subjects were divided into fewer groups due to granularity of data. For vegetable oils and margarine, the frequency of use was not recorded, and subjects were assigned a score of either 0 or 5 based on using vegetable oils or margarine, or not using either. The scores of these five subcategories were then added up to generate the complete modified FCHEI-score, and groupwise differences were examined for both the score as a whole and for the distribution of subjects within each score quartile. An experienced nutritionist was consulted when modifying the FCHEI.

### **Physical activity**

Physical activity was investigated using the activity monitor ActiGraph wGT3X-BT, (ActiGraph LLC, Pensacola, FL, USA), and physical activity was measured for 7 consecutive days, yielding 6 days of full data. Data was recorded in 10 second epochs and analyzed using Evenson's cut-off points [2], and time spent sleeping was generated algorithmically [3]. Mean times per day, weighted for weekday and weekend days, are reported. Minimum recorded time per day, for a day to be considered valid, was set at 480 min, with 180 min of sleep required. For a measurement to be considered valid at least 2 full weekdays and 1 weekend day had to be recorded.

### **References**

1. Kyttälä P, Erkkola M, Lehtinen-Jacks S, Ovaskainen ML, Uusitalo L, Veijola R, Simell O, Knip M, Virtanen SM (2014) Finnish Children Healthy Eating Index (FCHEI) and its associations with family and child characteristics in pre-school children. *Public Health Nutr* 17:2519-2527
2. Evenson KR, Catellier DJ, Gill K, Ondrak KS, McMurray RG (2008) Calibration of two objective measures of physical activity for children. *J Sports Sci* 26:1557-1565
3. Sadeh AV, Sharkey KM, Carskadon MA (1994) Fundamental Research Activity-Based Sleep-Wake Identification: An Empirical Test of Methodological Issues. *Sleep* 17:201

## SUPPLEMENTARY TABLES

**Supplementary Table 1.** Dietary patterns for the AGA, SGA and LGA groups according to the Finnish Healthy Eating Index, with score ranges specified for index, its quartiles, and its subcategories, along with physical activity, as measured with Actigraph, compared between groups.

|                                                                        | AGA  | (N = 48)    | SGA  | (N = 23)    | LGA          | (N = 19)    | p     |
|------------------------------------------------------------------------|------|-------------|------|-------------|--------------|-------------|-------|
| Finnish Children Healthy Eating Index Score (3-26)                     | 16   | ± 6         | 15   | ± 4         | 14           | ± 5         | 0.705 |
| <i>Finnish Children Healthy Eating Index Quartiles</i>                 |      |             |      |             |              |             |       |
| Quartile 1 (3-10)                                                      | 12   | 25%         | 5    | 25%         | 5            | 29%         | 0.422 |
| Quartile 2 (11-16)                                                     | 12   | 25%         | 7    | 35%         | 4            | 24%         |       |
| Quartile 3 (17-21)                                                     | 11   | 23%         | 7    | 35%         | 6            | 35%         |       |
| Quartile 4 (21-26)                                                     | 13   | 27%         | 1    | 5%          | 2            | 12%         |       |
| <i>Finnish Children Healthy Eating Indexing Subcategories</i>          |      |             |      |             |              |             |       |
| Vegetables, fruits and berries (1-10)                                  | 5    | 3; 9        | 5    | 3; 8        | 5            | 2; 7        | 0.732 |
| Skimmed milk (0-5)                                                     | 1    | 0; 2        | 1    | 0; 2        | 0            | 0; 0        | 0.054 |
| Foods containing high amounts of sugar (1-10)                          | 5    | 3; 8        | 6    | 4; 8        | 8            | 3; 10       | 0.668 |
| Fish and fish dishes (0-4)                                             | 1    | 1; 2        | 2    | 1; 3        | 1            | 1; 2        | 0.375 |
| <i>Vegetable oils and margarine (fat ≥ 55 %) (0 or 5)</i>              |      |             |      |             |              |             |       |
| Vegetable oils or margarine, fat content ≥ 55% (5)                     | 29   | 60%         | 15   | 75 %        | 12           | 71 %        | 0.500 |
| Does not use vegetable oils or margarine, or uses low-fat versions (0) | 19   | 40%         | 5    | 25 %        | 5            | 29 %        |       |
| <i>Physical activity</i>                                               |      |             |      |             |              |             |       |
| Wearing time (awake) (min)                                             | 784  | ± 41        | 760  | ± 33        | 757          | ± 56        | 0.032 |
| Sedentary time (min)                                                   | 428  | 396; 456    | 415  | 378; 454    | 421          | 376; 449    | 0.511 |
| Light physical activity (min)                                          | 288  | ± 29        | 278  | ± 31        | 275          | ± 37        | 0.286 |
| Moderate physical activity (min)                                       | 51   | ± 15        | 49   | ± 12        | 49           | ± 15        | 0.810 |
| Vigorous physical activity (min)                                       | 21   | 15; 27      | 16   | 14; 26      | 19           | 15; 31      | 0.580 |
| Moderate and vigorous physical activity (min)                          | 72   | ± 23        | 69   | ± 19        | 71           | ± 25        | 0.834 |
| Number of steps (n)                                                    | 9306 | 8390; 11403 | 8878 | 8213; 10748 | 8715         | 7998; 10015 | 0.447 |
| Time spent in bed (h)                                                  | 10.1 | ± 0.5       | 10.4 | ± 0.4       | <b>10.5*</b> | ± 0.7       | 0.040 |
| Sleeping time (h)                                                      | 9.4  | 9.07; 9.80  | 9.5  | 9.06; 9.90  | 9.7          | 9.2; 10.4   | 0.300 |
| Moderate and vigorous physical activity of wearing time (%)            | 9.2  | ± 3.0       | 9.0  | ± 2.6       | 9.3          | ± 2.9       | 0.964 |

Data are given as mean ± SD, median Q1; Q3, or N and % within group. P correspond to ANOVA, Kruskal-Wallis, or Fisher-Freeman-Halton exact test, as appropriate. Significant differences in post-hoc tests (Dunnet) are bolded and indicated with \*, corresponding to a significance level of <0.05. *AGA* appropriate for gestational age; *LGA* large for gestational age; *SGA* small for gestational age.

**Supplementary Table 2.** Cardiovascular morphology for the AGA, SGA and LGA groups, unadjusted.

|                                                          | AGA         | (N = 48)          | SGA            | (N = 23)          | LGA         | (N = 19)          | p                |
|----------------------------------------------------------|-------------|-------------------|----------------|-------------------|-------------|-------------------|------------------|
| <i>Inferior vena cava, aorta, and pulmonary artery</i>   |             |                   |                |                   |             |                   |                  |
| Inferior vena cava minimum diameter (cm)                 | 0.28        | 0.22;0.36         | 0.29           | 0.20; 0.37        | 0.25        | 0.22; 0.38        | 0.940            |
| Inferior vena cava maximum diameter (cm)                 | 0.92        | ± 0.19            | 0.81           | ± 0.20            | 0.93        | ± 0.24            | 0.089            |
| Abdominal aorta diameter, diastole (cm)                  | 0.80        | ± 0.09            | 0.77           | ± 0.07            | 0.84        | ± 0.07            | 0.020            |
| Aortic proximal transverse arch diameter (cm)            | 1.54        | ± 0.19            | 1.47           | ± 0.17            | 1.55        | ± 0.18            | 0.385            |
| Aortic distal transverse arch diameter (cm)              | 1.20        | ± 0.14            | 1.17           | ± 0.13            | 1.20        | ± 0.13            | 0.703            |
| <b>Aortic isthmus diameter (cm)</b>                      | <b>1.12</b> | <b>1.05; 1.26</b> | <b>1.06*</b>   | <b>0.91; 1.10</b> | <b>1.14</b> | <b>0.99; 1.29</b> | <b>0.031</b>     |
| <b>Aortic valve diameter (cm)</b>                        | <b>1.39</b> | <b>± 0.13</b>     | <b>1.30***</b> | <b>± 0.07</b>     | <b>1.40</b> | <b>± 0.11</b>     | <b>&lt;0.001</b> |
| Aortic sinus diameter (cm)                               | 1.88        | ± 0.20            | 1.80           | ± 0.17            | 1.90        | ± 0.16            | 0.129            |
| Aortic sinotubular junction diameter (cm)                | 1.59        | 1.50; 1.78        | 1.58           | 1.50; 1.73        | 1.64        | 1.51; 1.71        | 0.454            |
| Pulmonary valve diameter (cm)                            | 1.91        | ± 0.19            | 1.78           | ± 0.18            | 1.88        | ± 0.21            | 0.068            |
| <i>Left ventricle and atrium</i>                         |             |                   |                |                   |             |                   |                  |
| Interventricular septum dimension (cm)                   | 0.4         | 0.4; 0.5          | 0.4            | 0.4; 0.5          | 0.5         | 0.4; 0.5          | 0.395            |
| Left ventricular diastolic diameter (cm)                 | 3.8         | ± 0.2             | 3.7            | ± 0.3             | 3.7         | ± 0.3             | 0.667            |
| Left ventricular posterior wall dimension (cm)           | 0.5         | 0.4; 0.5          | 0.4            | 0.4; 0.5          | 0.5         | 0.4; 0.5          | 0.688            |
| Left ventricular systolic diameter (cm)                  | 2.6         | 2.4; 2.7          | 2.5            | 2.3; 2.8          | 2.5         | 2.4; 2.7          | 0.704            |
| Left ventricular mass (g)                                | 42          | ± 8               | 40             | ± 9               | 41          | ± 7               | 0.754            |
| Left ventricular length (cm)                             | 5.4         | 5.2; 5.8          | 5.4            | 5.1; 5.7          | 5.5         | 5.2; 6.0          | 0.420            |
| <b>Left ventricular base (cm)</b>                        | <b>2.6</b>  | <b>2.4; 2.7</b>   | <b>2.5**</b>   | <b>2.3; 2.6</b>   | <b>2.7</b>  | <b>2.5; 2.9</b>   | <b>0.001</b>     |
| Left ventricular end-diastolic volume (ml)               | 41          | ± 8               | 38             | ± 6               | 44          | ± 8               | 0.076            |
| Left ventricular end-systolic volume (ml)                | 17          | ± 3               | 16             | ± 3               | 19          | ± 4               | 0.125            |
| <b>Left atrial volume (ml)</b>                           | <b>19</b>   | <b>15; 21</b>     | <b>17</b>      | <b>14; 21</b>     | <b>23*</b>  | <b>19; 26</b>     | <b>0.006</b>     |
| <i>Right ventricle and atrium</i>                        |             |                   |                |                   |             |                   |                  |
| Right ventricular anterior wall thickness (cm)           | 0.3         | 0.3; 0.3          | 0.3            | 0.3; 0.4          | 0.3         | 0.3; 0.4          | 0.439            |
| Right ventricular length (cm)                            | 4.9         | ± 0.4             | 4.8            | ± 0.4             | 5.1         | ± 0.4             | 0.125            |
| <b>Right ventricular base (cm)</b>                       | <b>2.6</b>  | <b>± 0.2</b>      | <b>2.5*</b>    | <b>± 0.2</b>      | <b>2.7</b>  | <b>± 0.2</b>      | <b>0.005</b>     |
| Right ventricular mid-cavity (cm)                        | 2.4         | 2.2; 2.5          | 2.3            | 2.2; 2.5          | 2.3         | 2.2; 2.7          | 0.354            |
| <b>Right ventricular diastolic area (cm<sup>2</sup>)</b> | <b>10.4</b> | <b>± 1.5</b>      | <b>9.5*</b>    | <b>± 1.1</b>      | <b>10.6</b> | <b>± 1.9</b>      | <b>0.010</b>     |
| Right ventricular systolic area (cm <sup>2</sup> )       | 5.8         | ± 1.1             | 5.5            | ± 0.6             | 6.1         | ± 1.2             | 0.134            |
| <b>Right atrial area (cm<sup>2</sup>)</b>                | <b>7.5</b>  | <b>± 1.2</b>      | <b>6.7**</b>   | <b>± 0.7</b>      | <b>8.0</b>  | <b>± 1.2</b>      | <b>&lt;0.001</b> |

Data are given as mean ± SD or median Q1; Q3. P correspond to ANOVA or Kruskal-Wallis test, as appropriate. Significant differences in post-hoc tests (Dunnet, Games-Howell or Mann-Whitney U) between SGA or LGA and AGA are bolded and indicated with \*, \*\*, \*\*\* corresponding to two-sided significance levels of < 0.05, < 0.01, and <0.001, respectively. The significance level of Mann-Whitney U test is Bonferroni corrected for two group comparisons. *AGA* appropriate for gestational age; *LGA* large for gestational age; *SGA* small for gestational age.

**Supplementary Table 3.** Cardiac function for the AGA, SGA and LGA groups assessed from inferior vena cava and Doppler measurements

|                                                             | AGA        | (N = 48)        | SGA         | (N = 23)        | LGA        | (N = 19)        | p            |
|-------------------------------------------------------------|------------|-----------------|-------------|-----------------|------------|-----------------|--------------|
| <i>Inferior vena cava</i>                                   |            |                 |             |                 |            |                 |              |
| Respiratory change of inferior vena cava lumen diameter (%) | 68         | ± 9             | 63          | ± 9             | 68         | ± 10            | 0.104        |
| <i>Pulmonary vein</i>                                       |            |                 |             |                 |            |                 |              |
| Pulmonary vein S-wave peak velocity (cm/s)                  | 43         | ± 8             | 45          | ± 9             | 44         | ± 9             | 0.643        |
| Pulmonary vein D-wave peak velocity (cm/s)                  | 53         | ± 7             | 58          | ± 8             | 54         | ± 9             | 0.061        |
| Pulmonary S/D -ratio (no unit)                              | 0.81       | 0.73; 0.91      | 0.76        | 0.69; 0.88      | 0.80       | 0.71; 0.90      | 0.579        |
| <i>Mitral inflow Doppler</i>                                |            |                 |             |                 |            |                 |              |
| <b>Mitral E-wave peak velocity (cm/s)</b>                   | <b>87</b>  | <b>80; 99</b>   | <b>99*</b>  | <b>90; 110</b>  | <b>87</b>  | <b>81; 98</b>   | <b>0.013</b> |
| <b>Mitral A-wave peak velocity (cm/s)</b>                   | <b>40</b>  | <b>32; 50</b>   | <b>49**</b> | <b>42; 55</b>   | <b>41</b>  | <b>34; 53</b>   | <b>0.014</b> |
| Mitral E/A -ratio (no unit)                                 | 2.3        | 1.8; 2.7        | 1.9         | 1.8; 2.2        | 2.1        | 1.8; 2.7        | 0.461        |
| Mitral inflow propagation velocity (cm/s)                   | 63         | ± 14            | 59          | ± 12            | 59         | ± 13            | 0.380        |
| <i>Left ventricle pulsed wave tissue Doppler</i>            |            |                 |             |                 |            |                 |              |
| Lateral E'-wave peak velocity (cm/s)                        | 18         | ± 3             | 18          | ± 3             | 19         | ± 2             | 0.343        |
| Lateral E/E' -ratio (no unit)                               | 5.1        | ± 1.0           | 5.6         | ± 1.2           | 4.7        | ± 0.6           | 0.020        |
| Lateral A'-wave peak velocity (cm/s)                        | 6          | ± 1             | 6           | ± 1             | 7          | ± 1             | 0.377        |
| Lateral S'-wave peak velocity (cm/s)                        | 9          | 8; 110          | 9           | 8; 10           | 10         | 9; 11           | 0.139        |
| Septal E'-wave peak velocity (cm/s)                         | 13         | ± 1             | 13          | ± 1             | 13         | ± 1             | 0.683        |
| <b>Septal E/E' -ratio (no unit)</b>                         | <b>6.6</b> | <b>6.0; 8.1</b> | <b>7.5*</b> | <b>7.0; 8.3</b> | <b>6.7</b> | <b>6.1; 7.0</b> | <b>0.007</b> |
| Septal A'-wave peak velocity (cm/s)                         | 5          | 5; 6            | 5           | 5; 6            | 6          | 5; 6            | 0.019        |
| Septal S'-wave peak velocity (cm/s)                         | 8          | ± 1             | 7           | ± 1             | 8          | ± 1             | 0.003        |
| <i>Tricuspid inflow Doppler</i>                             |            |                 |             |                 |            |                 |              |
| Tricuspid E-wave peak velocity (cm/s)                       | 50         | ± 8             | 54          | ± 7             | 50         | ± 8             | 0.128        |
| Tricuspid A-wave peak velocity (cm/s)                       | 36         | ± 8             | 36          | ± 6             | 39         | ± 10            | 0.615        |
| Tricuspid E/A -ratio (no unit)                              | 1.4        | ± 0.3           | 1.6         | ± 0.4           | 1.3        | ± 0.3           | 0.131        |
| <i>Right ventricle pulsed wave tissue Doppler</i>           |            |                 |             |                 |            |                 |              |
| Lateral E'-wave peak velocity (cm/s)                        | 15         | ± 2             | 15          | ± 2             | 14         | ± 2             | 0.390        |
| Tricuspid E/E' -ratio (no unit)                             | 3.5        | ± 0.7           | 3.6         | ± 0.6           | 3.7        | ± 0.7           | 0.740        |
| Lateral A'-wave peak velocity (cm/s)                        | 9          | ± 2             | 8           | ± 2             | 9          | ± 2             | 0.396        |
| Lateral S'-wave peak velocity (cm/s)                        | 13         | ± 2             | 13          | ± 2             | 13         | ± 1             | 0.600        |

Data are given as mean ± SD or median Q1; Q3. P correspond to ANOVA or Kruskal-Wallis test, as appropriate. Significant differences in post-hoc tests (Dunnett, Games-Howell or Mann-Whitney U) between SGA or LGA and AGA are bolded and indicated with \*, \*\* corresponding to two-sided significance levels of < 0.05, and < 0.001, respectively. The significance level of Mann-Whitney U test is Bonferroni corrected for two group comparisons. *AGA* appropriate for gestational age; *LGA* large for gestational age; *SGA* small for gestational age.

**Supplementary Table 4.** Speckle-tracking strain measurements for the AGA, SGA, and LGA groups.

|                                                                                                                                                                                                                                     | AGA   | (N = 48) | SGA   | (N = 23) | LGA   | (N = 19) | p     |
|-------------------------------------------------------------------------------------------------------------------------------------------------------------------------------------------------------------------------------------|-------|----------|-------|----------|-------|----------|-------|
| <i>Left ventricle circumferential strain<sup>a</sup></i>                                                                                                                                                                            |       |          |       |          |       |          |       |
| Left ventricular global basal circumferential peak strain (%)                                                                                                                                                                       | -18.9 | ± 2.8    | -20.0 | ± 3.2    | -19.3 | ± 1.8    | 0.370 |
| Left ventricular global basal circumferential systolic strain rate (1/s)                                                                                                                                                            | 1.3   | ± 0.2    | -1.4  | ± 0.2    | -1.3  | ± 0.1    | 0.153 |
| Left ventricular global basal circumferential early diastolic strain rate (1/s)                                                                                                                                                     | 1.9   | ± 0.4    | 2.0   | ± 0.4    | 1.9   | ± 0.4    | 0.530 |
| Left ventricular global basal circumferential late diastolic strain rate (1/s)                                                                                                                                                      | 0.4   | 0.3; 0.5 | 0.5   | 0.3; 0.6 | 0.4   | 0.3; 0.5 | 0.420 |
| <i>Left ventricle longitudinal strain<sup>b</sup></i>                                                                                                                                                                               |       |          |       |          |       |          |       |
| Left ventricular global longitudinal peak strain (%)                                                                                                                                                                                | -21.9 | ± 2.0    | -21.2 | ± 1.7    | -21.6 | ± 1.6    | 0.347 |
| Left ventricular global longitudinal systolic strain rate (1/s)                                                                                                                                                                     | -1.3  | ± 0.1    | -1.2  | ± 0.2    | -1.2  | 0.1      | 0.141 |
| Left ventricular global longitudinal early diastolic strain rate (1/s)                                                                                                                                                              | 2.6   | ± 0.4    | 2.7   | ± 0.3    | 2.5   | ± 0.3    | 0.532 |
| Left ventricular global longitudinal late diastolic strain rate (1/s)                                                                                                                                                               | 0.6   | 0.5; 0.7 | 0.6   | 0.6; 0.7 | 0.7   | 0.5; 0.7 | 0.406 |
| <i>Right ventricle free wall longitudinal strain<sup>c</sup></i>                                                                                                                                                                    |       |          |       |          |       |          |       |
| Right ventricular global longitudinal peak strain (%)                                                                                                                                                                               | -29.8 | ± 4.5    | -28.5 | ± 5.7    | -29.8 | ± 5.3    | 0.729 |
| Right ventricular global longitudinal systolic strain rate (1/s)                                                                                                                                                                    | -1.9  | ± 0.4    | -2.1  | ± 0.4    | -1.9  | ± 0.5    | 0.475 |
| Right ventricular global longitudinal early diastolic strain rate (1/s)                                                                                                                                                             | 3.0   | ± 0.8    | 2.9   | ± 0.9    | 2.5   | ± 0.5    | 0.101 |
| Right ventricular global longitudinal late diastolic strain rate (1/s)                                                                                                                                                              | 1.0   | ± 0.4    | 0.9   | ± 0.5    | 1.2   | ± 0.7    | 0.479 |
| Data are given as mean ± SD or median Q1; Q3. P correspond to ANOVA or Kruskal-Wallis test, as appropriate. <i>AGA</i> appropriate for gestational age; <i>LGA</i> large for gestational age; <i>SGA</i> small for gestational age. |       |          |       |          |       |          |       |
| <sup>a</sup> Measured from the parasternal short axis view at papillary muscle level from the parasternal short-axis views.                                                                                                         |       |          |       |          |       |          |       |
| <sup>b</sup> Mean of measurements from the apical 4- and 2-chamber views.                                                                                                                                                           |       |          |       |          |       |          |       |
| <sup>c</sup> Measured from the free ventricular wall in the tilted apical 4-chamber view.                                                                                                                                           |       |          |       |          |       |          |       |



**Supplementary Table 5.** Univariate analyses to assess the effect sex, birth weight, anthropometrics, and adiposity on cardiac morphology

|                                                   | $\alpha$ for<br>BSA <sup>a</sup> | Male sex                        | Birth<br>weight<br>Z-score | Height<br>(cm)  | Height <sup>2,16</sup><br>(m <sup>2,16</sup> ) | Weight          | Thoracic<br>circumference<br>(cm) | Lean body<br>mass (kg) | BSA (m <sup>2</sup> ) | BSA <sup>a</sup> (m <sup>a</sup> ) | BMI<br>(kg/m <sup>2</sup> ) | Body fat<br>percentage<br>(%) |
|---------------------------------------------------|----------------------------------|---------------------------------|----------------------------|-----------------|------------------------------------------------|-----------------|-----------------------------------|------------------------|-----------------------|------------------------------------|-----------------------------|-------------------------------|
|                                                   |                                  | T-test, mean<br>difference (SE) | r                          | r               | r                                              | r               | r                                 | r                      | r                     | r                                  | r                           | r                             |
| <i>Aorta and pulmonary artery</i>                 |                                  |                                 |                            |                 |                                                |                 |                                   |                        |                       |                                    |                             |                               |
| Abdominal aorta diameter (cm)                     | 0.50                             | 0.034 (0.018)                   | <b>0.294**</b>             | 0.209           | na                                             | <b>0.367***</b> | <b>0.339**</b>                    | <b>0.326**</b>         | <b>0.352***</b>       | <b>0.348**</b>                     | <b>0.360***</b>             | <b>0.222*</b>                 |
| Aortic proximal transverse arch diameter (cm)     | 0.50                             | -0.036 (0.042)                  | 0.131                      | 0.103           | na                                             | <b>0.237*</b>   | 0.209                             | <b>0.253*</b>          | <b>0.230*</b>         | <b>0.236*</b>                      | <b>0.279*</b>               | 0.164                         |
| Aortic distal transverse arch diameter (cm)       | 0.50                             | 0.037 (0.030)                   | 0.152                      | <b>0.307**</b>  | na                                             | <b>0.282*</b>   | <b>0.219*</b>                     | <b>0.347**</b>         | <b>0.299**</b>        | <b>0.301**</b>                     | 0.189                       | 0.064                         |
| Aortic isthmus diameter (cm)                      | 0.50                             | 0.037 (0.038)                   | <b>0.312**</b>             | <b>0.360***</b> | na                                             | <b>0.275*</b>   | <b>0.236*</b>                     | <b>0.370***</b>        | <b>0.305**</b>        | <b>0.308**</b>                     | 0.150                       | 0.056                         |
| Aortic valve diameter (cm)                        | 0.50                             | <b>0.067 (0.024)**</b>          | <b>0.293**</b>             | <b>0.412***</b> | na                                             | <b>0.410***</b> | <b>0.371***</b>                   | <b>0.511***</b>        | <b>0.435***</b>       | <b>0.439***</b>                    | <b>0.295**</b>              | 0.206                         |
| Aortic sinus diameter (cm)                        | 0.50                             | <b>0.093 (0.040)*</b>           | 0.184                      | <b>0.301**</b>  | na                                             | <b>0.307**</b>  | <b>0.312**</b>                    | <b>0.440***</b>        | <b>0.326**</b>        | <b>0.331**</b>                     | <b>0.227*</b>               | 0.080                         |
| Aortic sinotubular junction diameter (cm)         | 0.50                             | 0.037 (0.038)                   | 0.120                      | <b>0.241*</b>   | na                                             | <b>0.243*</b>   | <b>0.247*</b>                     | <b>0.375***</b>        | <b>0.257*</b>         | <b>0.260*</b>                      | 0.185                       | 0.060                         |
| Pulmonary valve diameter (cm)                     | 0.50                             | 0.090 (0.046)                   | 0.162                      | 0.226           | na                                             | 0.170           | 0.188                             | <b>0.265*</b>          | 0.192                 | 0.196                              | 0.095                       | 0.022                         |
| <i>Left ventricle and atrium</i>                  |                                  |                                 |                            |                 |                                                |                 |                                   |                        |                       |                                    |                             |                               |
| Left ventricular diastolic diameter (cm)          | 0.45                             | <b>0.214 (0.053)***</b>         | -0.020                     | <b>0.412***</b> | na                                             | <b>0.329**</b>  | <b>0.383***</b>                   | <b>0.427***</b>        | <b>0.357***</b>       | <b>0.359***</b>                    | 0.188                       | 0.030                         |
| Left ventricular mass (g)                         | 1.25                             | <b>4.112 (1.674)*</b>           | 0.068                      | <b>0.355***</b> | <b>0.351***</b>                                | <b>0.277**</b>  | <b>0.312**</b>                    | <b>0.372***</b>        | <b>0.307**</b>        | <b>0.303**</b>                     | 0.165                       | 0.004                         |
| Left ventricle length (cm)                        | 0.45                             | 0.165 (0.093)                   | <b>0.225*</b>              | <b>0.337**</b>  | na                                             | <b>0.370***</b> | <b>0.403***</b>                   | <b>0.437***</b>        | <b>0.387***</b>       | <b>0.389***</b>                    | <b>0.294**</b>              | 0.135                         |
| Left ventricle base (cm)                          | 0.45                             | 0.049 (0.042)                   | <b>0.304**</b>             | <b>0.565***</b> | na                                             | <b>0.550***</b> | <b>0.504***</b>                   | <b>0.599***</b>        | <b>0.578***</b>       | <b>0.581***</b>                    | <b>0.393***</b>             | <b>0.320*</b>                 |
| Left ventricle end-diastolic volume (ml)          | 1.30                             | <b>4.080 (1.580)*</b>           | <b>0.239*</b>              | <b>0.439***</b> | na                                             | <b>0.427***</b> | <b>0.425***</b>                   | <b>0.534***</b>        | <b>0.450***</b>       | <b>0.448***</b>                    | <b>0.304**</b>              | 0.117                         |
| Left atrium systolic volume (ml)                  | 1.48                             | 1.328 (0.920)                   | <b>0.332**</b>             | <b>0.421***</b> | na                                             | <b>0.468***</b> | <b>0.442***</b>                   | <b>0.572***</b>        | <b>0.487**</b>        | <b>0.480***</b>                    | <b>0.382***</b>             | 0.144                         |
| <i>Right ventricle and atrium</i>                 |                                  |                                 |                            |                 |                                                |                 |                                   |                        |                       |                                    |                             |                               |
| Right ventricle length (cm)                       | 0.50                             | 0.179 (0.091)                   | 0.182                      | <b>0.344**</b>  | na                                             | <b>0.303**</b>  | <b>0.341**</b>                    | <b>0.415***</b>        | <b>0.330**</b>        | <b>0.336**</b>                     | 0.204                       | 0.089                         |
| Right ventricle base (cm)                         | 0.50                             | 0.064 (0.054)                   | <b>0.329**</b>             | <b>0.403***</b> | na                                             | <b>0.275*</b>   | <b>0.293**</b>                    | <b>0.404***</b>        | <b>0.312**</b>        | <b>0.318**</b>                     | 0.130                       | 0.106                         |
| Right ventricle mid-cavity (cm)                   | 0.50                             | <b>0.169 (0.053)**</b>          | 0.114                      | <b>0.445***</b> | na                                             | <b>0.326**</b>  | <b>0.344**</b>                    | <b>0.418***</b>        | <b>0.356***</b>       | <b>0.354***</b>                    | 0.155                       | 0.128                         |
| Right ventricle diastolic area (cm <sup>2</sup> ) | na                               | <b>1.039 (0.317)**</b>          | 0.206                      | <b>0.511***</b> | na                                             | <b>0.400***</b> | <b>0.421***</b>                   | <b>0.527***</b>        | <b>0.440***</b>       | na                                 | <b>0.224*</b>               | 0.130                         |
| Right atrium systolic area (cm <sup>2</sup> )     | na                               | 0.501 (0.252)                   | <b>0.399***</b>            | <b>0.499***</b> | na                                             | <b>0.456***</b> | <b>0.468***</b>                   | <b>0.545***</b>        | <b>0.489***</b>       | na                                 | <b>0.307**</b>              | 0.198                         |

Mean difference is reported as male – female (SE), reported r-values are Pearson's correlation coefficient. Significant associations are bolded, with \*, \*\*, \*\*\* corresponding to two-sided significance levels of < 0.05, < 0.01, and < 0.001. The effect of age of was similarly explored using in univariate correlation analyses, with no significant correlations (not shown). The effect of systolic blood pressure and maternal pre-gestational diabetes on left ventricle mass was assessed with correlation analyses and Student's T-test, with neither showing a significant association (not shown). No significant associations were found for the non-normally distributed septal and left ventricular posterior wall dimensions and the right ventricular anterior wall dimensions, when examining the effect of sex using the Mann-Whitney U-test and the effect of birth weight, anthropometrics and adiposity using Spearman's correlation analysis (not shown). *BMI* body mass index and *BSA* body surface area.



**Supplementary Table 6.** Significant linear models assessing the effect of birth weight on cardiovascular dimensions.

| <i>Aorta and pulmonary artery</i>                 | R <sup>2</sup> | Model P | Predictor                   | Unstandardized $\beta$ | Standardized B | p                |
|---------------------------------------------------|----------------|---------|-----------------------------|------------------------|----------------|------------------|
| Abdominal aorta diameter (cm)                     | 0.158          | 0.003   | Male sex                    | 0.025                  | 0.154          | 0.159            |
|                                                   |                |         | Birth weight Z-score        | 0.007                  | 0.219          | 0.070            |
|                                                   |                |         | Lean body mass (kg)         | 0.007                  | 0.186          | 0.135            |
| Aortic distal arch transverse diameter (cm)       | 0.124          | 0.016   | Male sex                    | 0.017                  | 0.064          | 0.568            |
|                                                   |                |         | Birth weight Z-score        | 0.000                  | 0.001          | 0.994            |
|                                                   |                |         | <b>Lean body mass (kg)</b>  | <b>0.021</b>           | <b>0.332</b>   | <b>0.010</b>     |
| Aortic isthmus diameter (cm)                      | 0.173          | 0.002   | Male sex                    | 0.010                  | 0.029          | 0.789            |
|                                                   |                |         | Birth weight Z-score        | 0.012                  | 0.176          | 0.145            |
|                                                   |                |         | <b>Lean body mass (kg)</b>  | <b>0.024</b>           | <b>0.298</b>   | <b>0.017</b>     |
| Aortic valve diameter (cm)                        | 0.307          | <0.001  | Male sex                    | 0.034                  | 0.146          | 0.133            |
|                                                   |                |         | Birth weight Z-score        | 0.005                  | 0.104          | 0.324            |
|                                                   |                |         | <b>Lean body mass (kg)</b>  | <b>0.024</b>           | <b>0.445</b>   | <b>&lt;0.001</b> |
| Aortic sinus diameter (cm)                        | 0.216          | <0.001  | Male sex                    | 0.046                  | 0.123          | 0.236            |
|                                                   |                |         | Birth weight Z-score        | -0.001                 | -0.014         | 0.906            |
|                                                   |                |         | <b>Lean body mass (kg)</b>  | <b>0.038</b>           | <b>0.427</b>   | <b>&lt;0.001</b> |
| Aortic sinotubular junction diameter (cm)         | 0.140          | 0.015   | Male sex                    | 0.001                  | 0.003          | 0.977            |
|                                                   |                |         | Birth weight Z-score        | -0.004                 | -0.063         | 0.628            |
|                                                   |                |         | <b>Lean body mass (kg)</b>  | <b>0.032</b>           | <b>0.400</b>   | <b>0.004</b>     |
| <i>Left ventricle and atrium</i>                  |                |         |                             |                        |                |                  |
| Left ventricle diastolic diameter (cm)            | 0.325          | <0.001  | <b>Male sex</b>             | <b>0.156</b>           | <b>0.292</b>   | <b>0.003</b>     |
|                                                   |                |         | <b>Birth weight Z-score</b> | <b>-0.026</b>          | <b>-0.238</b>  | <b>0.027</b>     |
|                                                   |                |         | <b>Lean body mass (kg)</b>  | <b>0.058</b>           | <b>0.466</b>   | <b>&lt;0.001</b> |
| Left ventricle mass (g)                           | 0.181          | 0.001   | Male sex                    | 2.565                  | 0.160          | 0.136            |
|                                                   |                |         | Birth weight Z-score        | -0.391                 | -0.118         | 0.316            |
|                                                   |                |         | <b>Lean body mass (kg)</b>  | <b>1.459</b>           | <b>0.391</b>   | <b>0.002</b>     |
| Left ventricle length (cm)                        | 0.200          | <0.001  | Male sex                    | 0.098                  | 0.111          | 0.287            |
|                                                   |                |         | Birth weight Z-score        | 0.007                  | 0.037          | 0.749            |
|                                                   |                |         | <b>Lean body mass (kg)</b>  | <b>0.080</b>           | <b>0.389</b>   | <b>0.001</b>     |
| Left ventricle base (cm)                          | 0.363          | <0.001  | Male sex                    | -0.013                 | -0.033         | 0.723            |
|                                                   |                |         | Birth weight Z-score        | 0.003                  | 0.032          | 0.752            |
|                                                   |                |         | <b>Lean body mass (kg)</b>  | <b>0.055</b>           | <b>0.594</b>   | <b>&lt;0.001</b> |
| Left ventricle end-diastolic volume (ml)          | 0.305          | <0.001  | Male sex                    | 2.330                  | 0.152          | 0.119            |
|                                                   |                |         | Birth weight Z-score        | 0.038                  | 0.012          | 0.911            |
|                                                   |                |         | <b>Lean body mass (kg)</b>  | <b>1.741</b>           | <b>0.489</b>   | <b>&lt;0.001</b> |
| Left atrium systolic volume (ml)                  | 0.331          | <0.001  | Male sex                    | 0.510                  | 0.060          | 0.531            |
|                                                   |                |         | Birth weight Z-score        | 0.115                  | 0.066          | 0.532            |
|                                                   |                |         | <b>Lean body mass (kg)</b>  | <b>1.039</b>           | <b>0.524</b>   | <b>&lt;0.001</b> |
| <i>Right ventricle and atrium</i>                 |                |         |                             |                        |                |                  |
| Right ventricle length (cm)                       | 0.187          | <0.001  | Male sex                    | 0.103                  | 0.119          | 0.259            |
|                                                   |                |         | Birth weight Z-score        | -0.001                 | -0.007         | 0.951            |
|                                                   |                |         | <b>Lean body mass (kg)</b>  | <b>0.079</b>           | <b>0.390</b>   | <b>0.002</b>     |
| Right ventricle base (cm)                         | 0.192          | <0.001  | Male sex                    | 0.027                  | 0.054          | 0.605            |
|                                                   |                |         | Birth weight Z-score        | 0.019                  | 0.182          | 0.115            |
|                                                   |                |         | <b>Lean body mass (kg)</b>  | <b>0.036</b>           | <b>0.307</b>   | <b>0.011</b>     |
| Right ventricle mid-cavity (cm)                   | 0.227          | <0.001  | <b>Male sex</b>             | <b>0.118</b>           | <b>0.225</b>   | <b>0.031</b>     |
|                                                   |                |         | Birth weight Z-score        | -0.006                 | -0.056         | 0.617            |
|                                                   |                |         | <b>Lean body mass (kg)</b>  | <b>0.047</b>           | <b>0.386</b>   | <b>0.001</b>     |
| Right ventricle diastolic area (cm <sup>2</sup> ) | 0.327          | <0.001  | <b>Male sex</b>             | <b>0.649</b>           | <b>0.207</b>   | <b>0.033</b>     |
|                                                   |                |         | Birth weight Z-score        | -0.017                 | -0.026         | 0.807            |
|                                                   |                |         | <b>Lean body mass (kg)</b>  | <b>0.360</b>           | <b>0.494</b>   | <b>&lt;0.001</b> |
| Right atrium systolic area (cm <sup>2</sup> )     | 0.336          | <0.001  | Male sex                    | 0.266                  | 0.111          | 0.245            |
|                                                   |                |         | Birth weight Z-score        | 0.096                  | 0.193          | 0.066            |
|                                                   |                |         | <b>Lean body mass (kg)</b>  | <b>0.240</b>           | <b>0.429</b>   | <b>&lt;0.001</b> |

Significant associations are bolded.
